# Supplementary material for: Laser-assisted synthesis of gold–graphene oxide nanocomposites: effect of pulse duration
Source: Royal Society of Chemistry journal article supplement (doi:10.1039/d0cp02953j), 2020-01-01
Supplement: d0cp02953j1.pdf [file d0cp02953j1.pdf]

# Electronic Supplementary Information: Laser-assisted synthesis of gold-graphene oxide nanocomposites: Does pulse duration matter?

Julian A. Bobb, Collin J. Rodrigues, M. Samy El-Shall,  
and Katharine Moore Tibbetts

**(a) 0.0033 mg/mL**

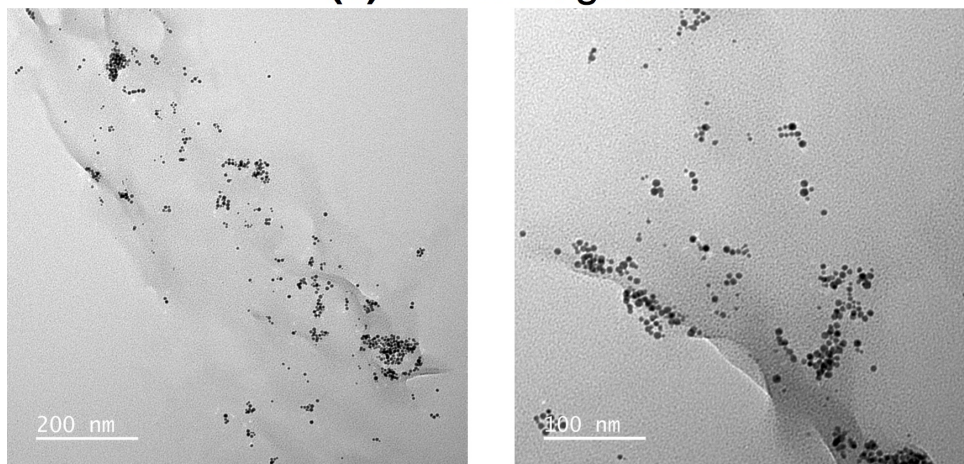

**(b) 0.33 mg/mL**

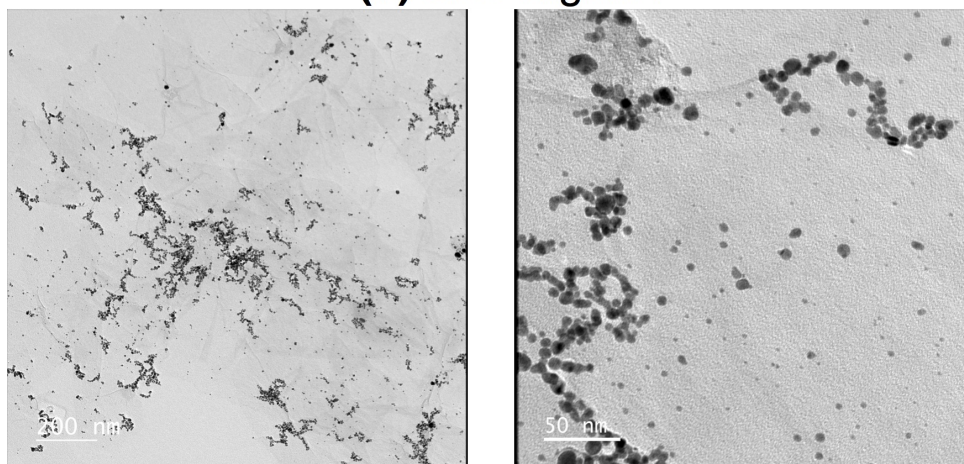

Figure 1: Additional TEM images and size distributions for ns laser processing of  $[\text{AuCl}_4]^-$  in 0.0033 mg/mL GO (a) and 0.33 mg/mL GO (b).

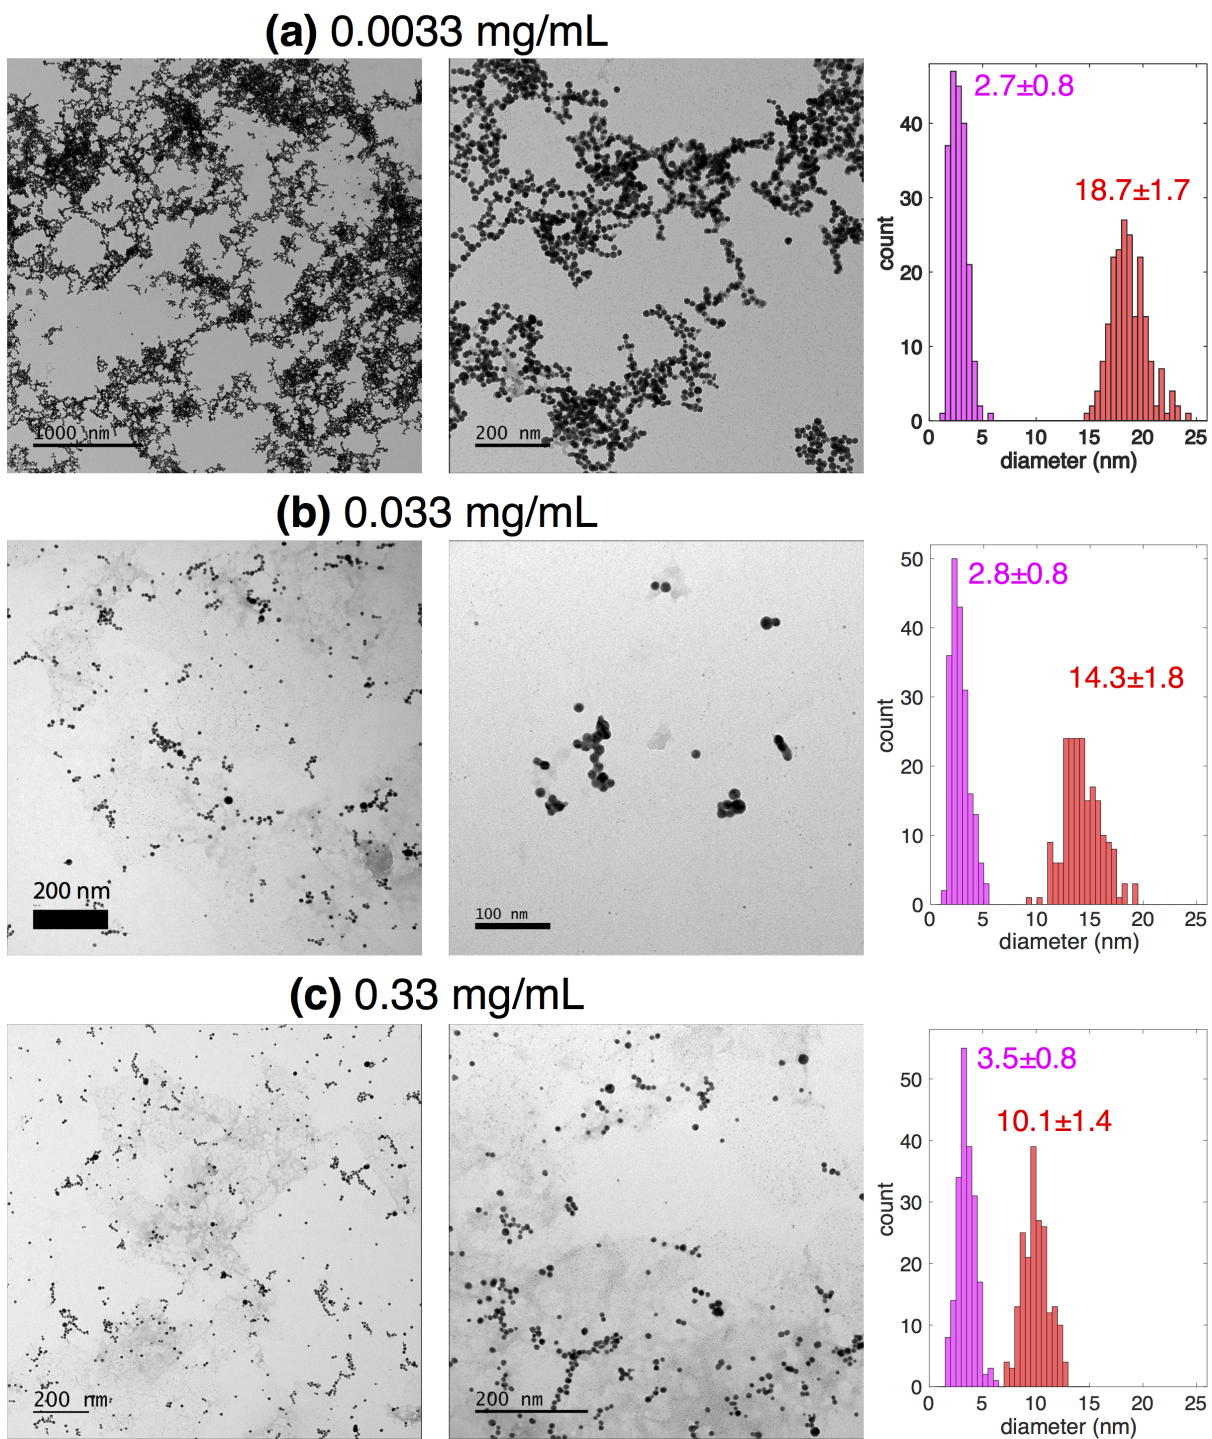

Figure 2: Additional TEM images and size distributions for fs laser processing of  $[\text{AuCl}_4]^-$  in 0.0033 mg/mL GO (a), 0.033 mg/mL GO (b), and 0.33 mg/mL GO (c).

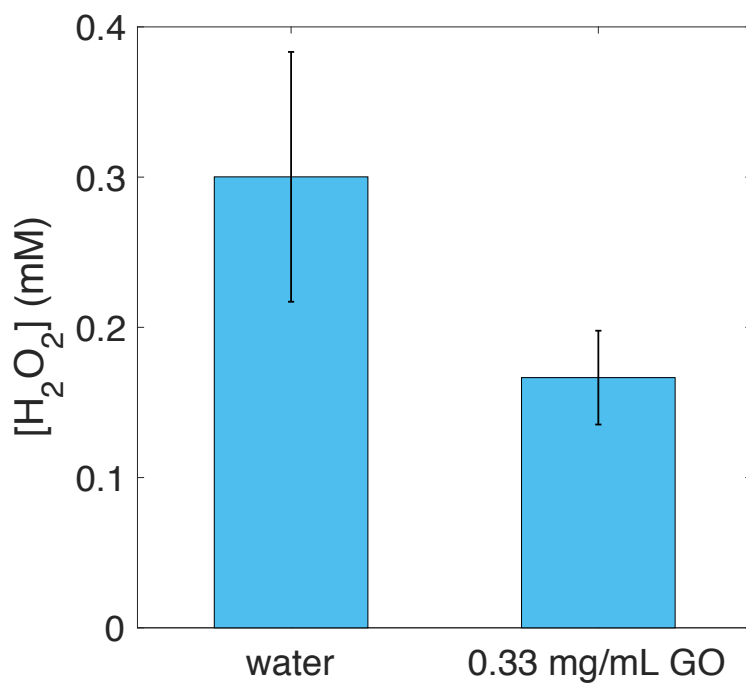

Figure 3: Yield of  $H_2O_2$  quantified by titanium sulfate assay for fs laser-processed water and 0.33 mg/mL GO solution. Error bars denote standard deviation from three independent experiments in each case.
